# Supplementary material for: Determining the target protein localization in 3D using the combination of FIB-SEM and APEX2
Source: PubMed Central journal article supplement (PMC5719812; doi:10.1007/s41048-017-0043-x), 2017-11-04
Supplement: 41048_2017_43_MOESM1_ESM.pdf [file 41048_2017_43_MOESM1_ESM.pdf]

## Supplementary Movies Legends

**Movie S1** A video of Z-slicing view of FIB-SEM reconstruction of cells transfected with MiD51-APEX2. The axial thickness is 15 nm and there are 260 slices in total.

**Movie S2** A video of Z-slicing view of FIB-SEM reconstruction of cells transfected with MiD49-APEX2. The axial thickness is 20 nm and there are 130 slices in total.

**Movie S3** A video of Z-slicing view of FIB-SEM reconstruction of cells transfected with APEX2-Mff. The axial thickness is 15 nm and there are 248 slices in total.

**Movie S4** A video of Z-slicing view of FIB-SEM reconstruction of cells transfected with APEX2-Fis1. The axial thickness is 20 nm and there are 133 slices in total.

**Movie S5** A video of Z-slicing view of FIB-SEM reconstruction of cells transfected with APEX2-Mfn2. The axial thickness is 20 nm and there are 198 slices in total.

Supplemental movies are available at  
<http://feilab.ibp.ac.cn/data/APEX2FIBSEM/>.
